# Supplementary figures and images for: What do patients prefer? A multinational, longitudinal, qualitative study on patient-preferred treatment outcomes in early rheumatoid arthritis
Source: PubMed Central journal article supplement — RMD Open. 2020 Sep 16;6(2):e001339. doi: 10.1136/rmdopen-2020-001339 (PMC7525256; doi:10.1136/rmdopen-2020-001339), 2020-09-16

## Supplementary file 1. Flow chart of participant recruitment

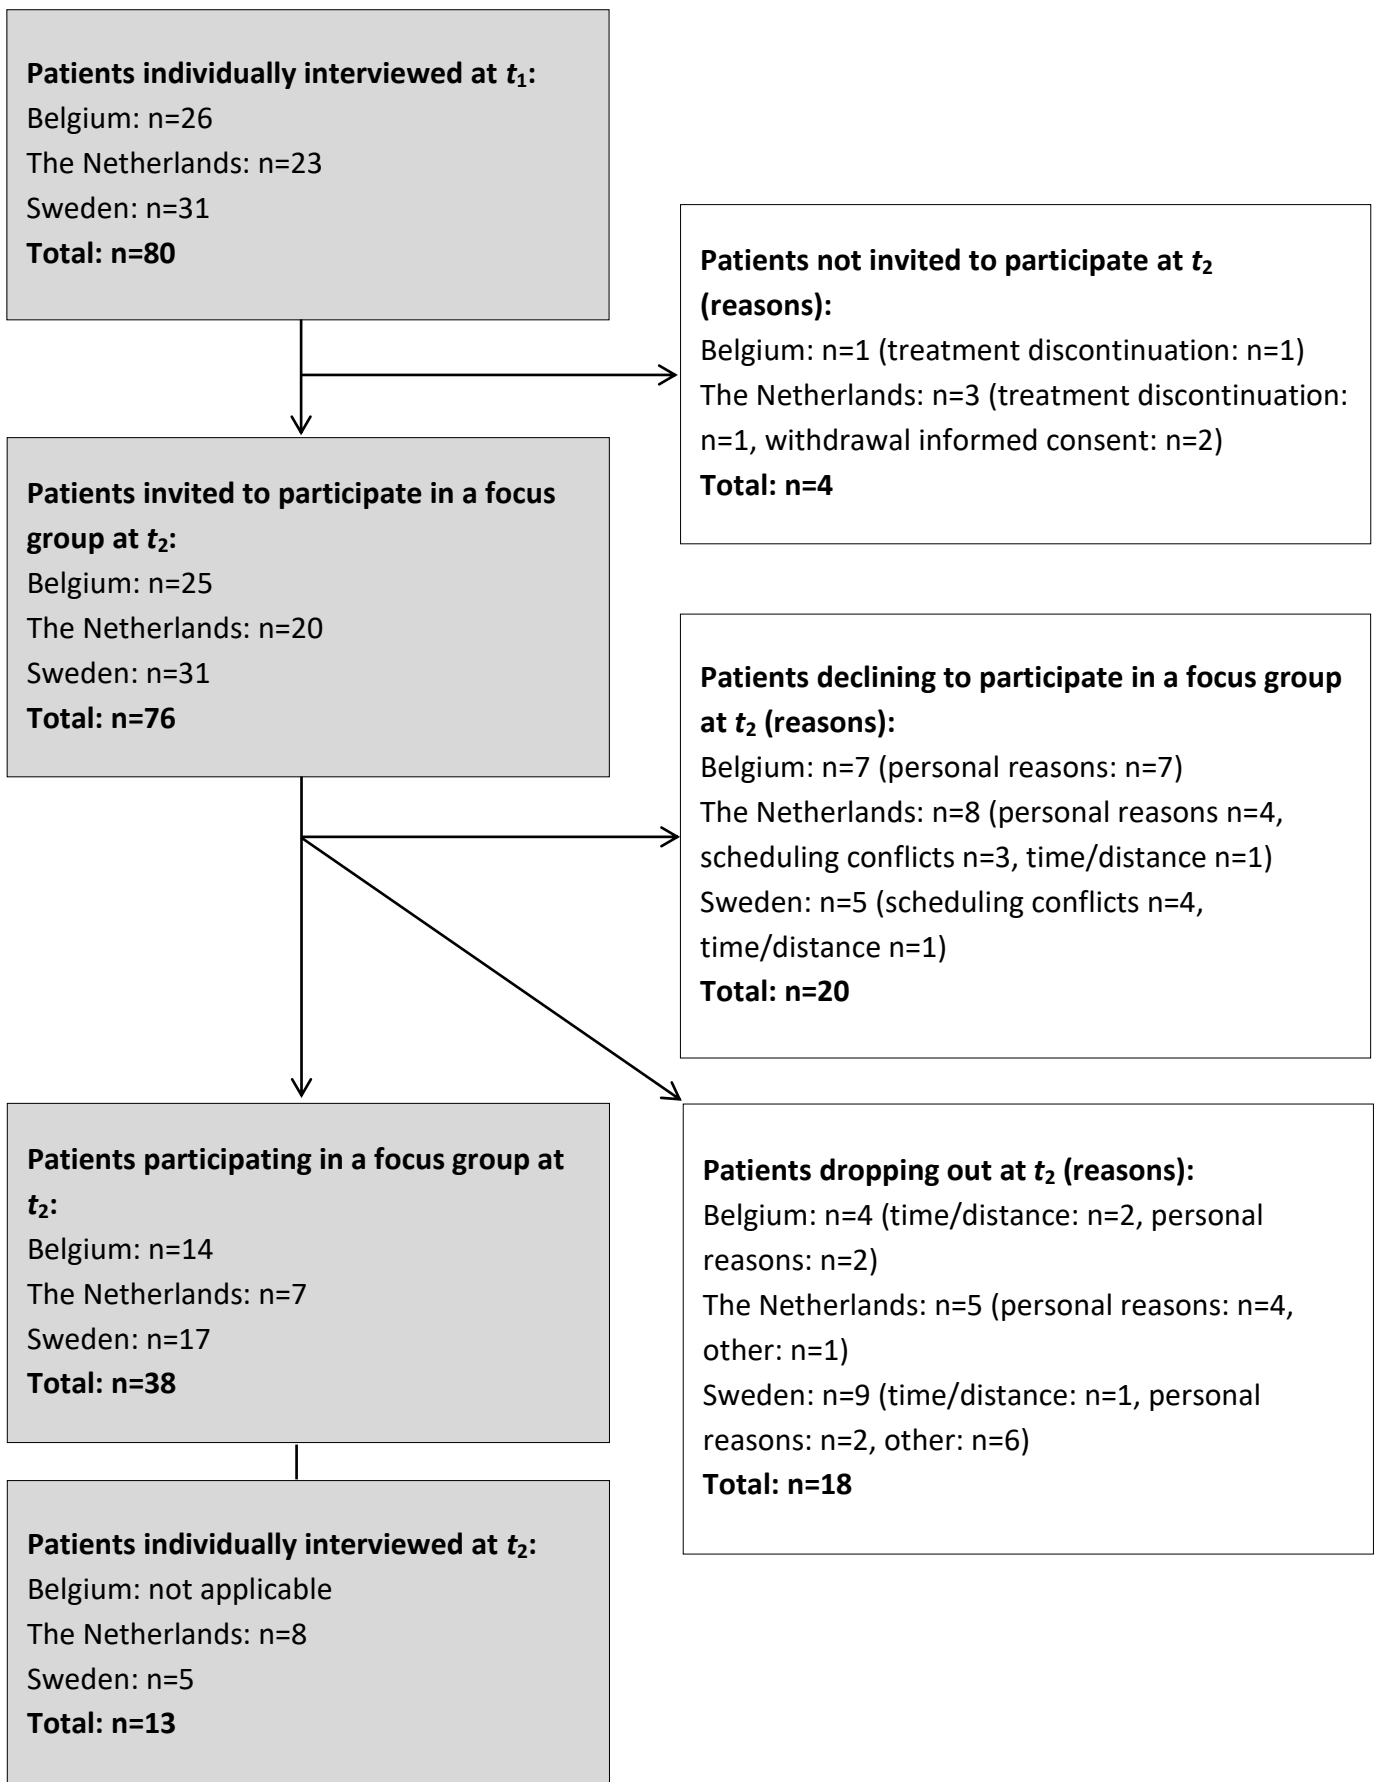

Abbreviations:  $t$ : time point.

Supplement: rmdopen-2020-001339s001.pdf [file rmdopen-2020-001339s001.pdf]
